# Supplementary material
Source: publisher site journal article supplement (https://www.spandidos-publications.com/6839/downloadSupplementary)
Supplement: Supplementary file 1 [file downloadSupplementary]

Figure S1. High-resolution scan of the original blots from Fig. 2. (A) The original blots of Bax protein. (B) The original blots of Bcl-2 protein. (C) The original blots of caspase-3 protein. (D) The original blots of  $\beta$ -actin.

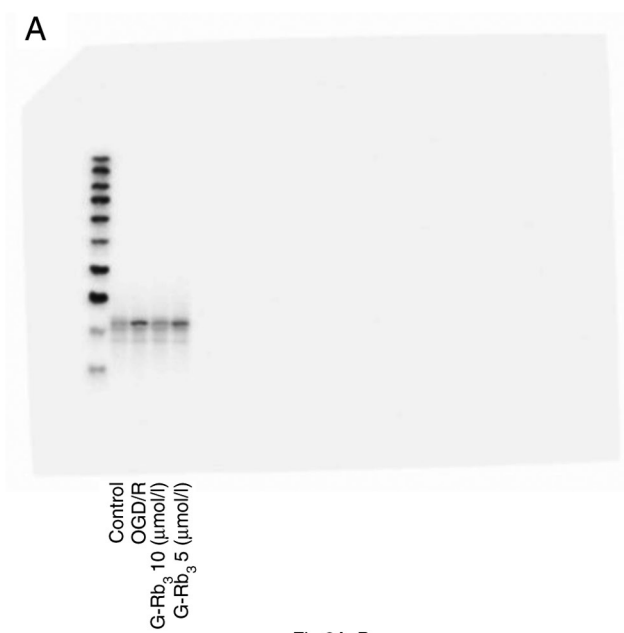

Fig.2A: Bax

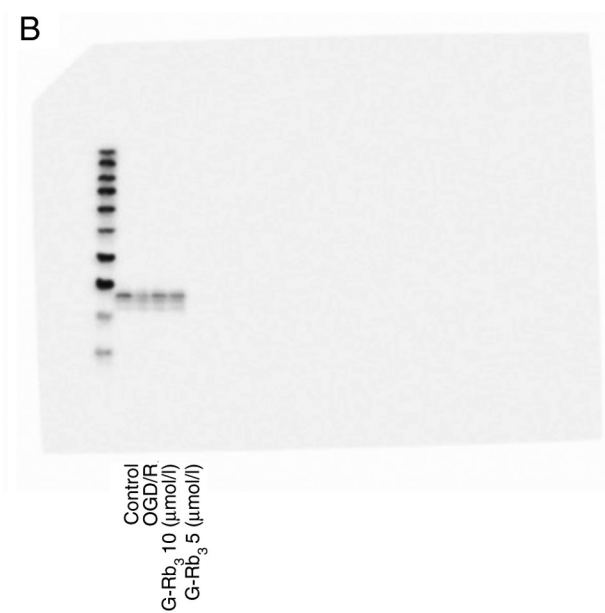

Fig.2A: Bcl-2

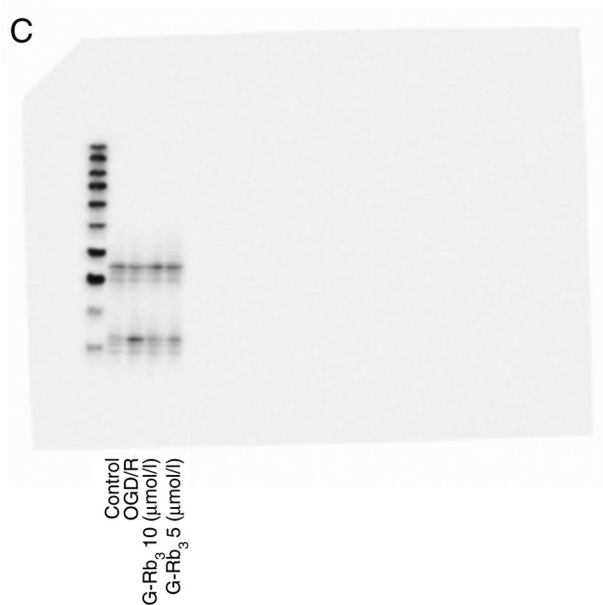

Fig.2A: Caspase-3

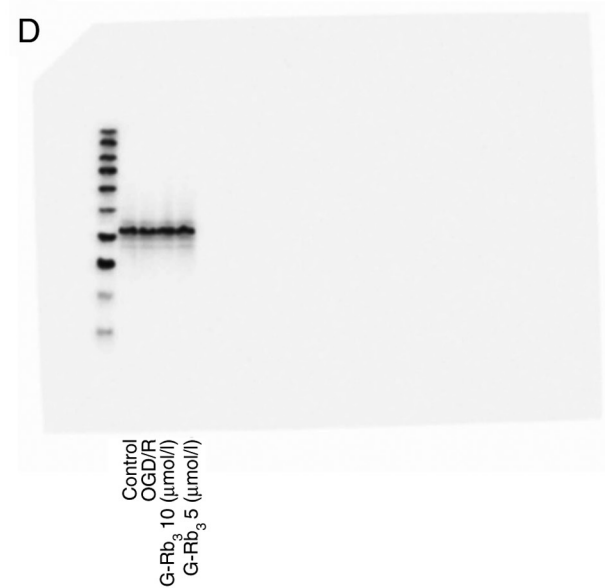

Fig.2A:  $\beta$ -actin
